# Supplementary material for: A Generalized Radiation Model for Human Mobility: Spatial Scale, Searching Direction and Trip Constraint
Source: PubMed Central journal article supplement (PMC4657960; doi:10.1371/journal.pone.0143500), 2015-11-24
Supplement: pone.0143500.s002.pdf [file pone.0143500.s002.pdf]

S1 Table. Statistical Characteristics of the Mobility Datasets in Our Case Studies.

|          | Node  | Edge    | Density | Population       | Traveller  | Modularity | Community |
|----------|-------|---------|---------|------------------|------------|------------|-----------|
| US       | 3,062 | 159,707 | 0.017   | [65, 9538191]    | 34,010,098 | 0.8921     | 47        |
| UK       | 346   | 45,487  | 0.381   | [34700, 1073000] | 135,747    | 0.2973     | 4         |
| Beijing  | 3,025 | 194,415 | 0.021   | [1, 17974]       | 1,048,981  | 0.3982     | 11        |
| Shenzhen | 1,634 | 117,238 | 0.044   | [1, 192003]      | 2,337,286  | 0.4621     | 14        |
| Abidjan  | 219   | 25,493  | 0.534   | [20, 17731]      | 519,710    | 0.6166     | 6         |
| Chicago  | 1,406 | 35,795  | 0.018   | [1, 1299]        | 72,063     | 0.5847     | 8         |

S2 Table. Statistical characteristics of the mobility datasets in our case studies. We collect trip OD matrices in two countries (US and UK) and four cities (Beijing and Shenzhen in Asia, Abidjan in Africa and Chicago in North America). The mobility networks are with significantly distinct properties. The number of nodes (locations) varies from hundreds to thousands. And edges in each network are different in terms of both total numbers and density (defined as the probability of movements being observed between two arbitrary locations). The modularity of each mobility network well indicates if the travel flows are concentrated in certain locations.
