# Supplementary material for: A Generalized Radiation Model for Human Mobility: Spatial Scale, Searching Direction and Trip Constraint
Source: PubMed Central journal article supplement (PMC4657960; doi:10.1371/journal.pone.0143500), 2015-11-24
Supplement: pone.0143500.s005.pdf [file pone.0143500.s005.pdf]

## S4 Text. Data Accessibility

All datasets (including both the mobility networks and the population distributions) used by the proposed models are available [here](#).
